# Supplementary material for: Assigning metabolic rate measurements to torpor and euthermy in heterothermic endotherms: ‘torpor’, a new package for R
Source: Oxford University Press journal article supplement (doi:10.1242/bio.059064), 2022-02-07
Supplement: bio059064supp.pdf [file bio059064supp.pdf]

**Table S1.** Model parameters and corroboration index for 28 datasets on small or medium-sized mammals described as either heterotherms or homeotherms.

| Species                                    | Type        | $m$               | Autors $M_{TNZ}$  | $M$ units                                    | Authors $T_{lc}$  | Authors $T_t$ | Authors                  | $N$ | $T_{lc}$ | $M_{TNZ}$ | $TMR$     | $T_t$ | $\beta_t$    | $\alpha_e$ | $\beta_c$                             | $\alpha_c$ | $\alpha_r$ | $MR_{inhibit}$ | $T_{be}$ | $T_{bt}$ | PPO $TMR$ | PPO $M_r$ | Valid assignments | Corroboration | $M$ assigned to torpor? |
|--------------------------------------------|-------------|-------------------|-------------------|----------------------------------------------|-------------------|---------------|--------------------------|-----|----------|-----------|-----------|-------|--------------|------------|---------------------------------------|------------|------------|----------------|----------|----------|-----------|-----------|-------------------|---------------|-------------------------|
| Unit                                       | -           | g                 | $M$ units         | -                                            | °C                | °C            | -                        | -   | °C       | $M$ units | $M$ units | °C    | $M$ units/°C | $M$ units  | $\log(M \text{ unit})/^\circ\text{C}$ | $M$ units  | $M$ units  | %              | °C       | °C       | %         | %         | -                 | -             | -                       |
| <i>Callithrix pygmaea</i>                  | Homeotherm  | 153               | 98                | $\text{mlO}_2 \text{ h}^{-1}$                | 27.5 <sup>8</sup> | —             | Genoud et al. 1997       | 27  | 29.15    | 102.97    | NI        | NI    | -9.78        | 388.45     | NI                                    | NI         | NI         | NI             | 39.77    | NI       | 89.80     | 86.80     | 0.63              | 1.00          | No                      |
| <i>Marmosa robinsoni</i>                   | Heterotherm | 122               | 0.8               | $\text{mlO}_2 \text{ g}^{-1} \text{ h}^{-1}$ | 26.5              | —             | McNab 1978               | 38  | 28.73    | 0.77      | NI        | NI    | -0.10        | 3.49       | NI                                    | NI         | NI         | NI             | 36.41    | NI       | 77.70     | 92.10     | 0.68              | 1.00          | No                      |
| <i>Phenacomys intermedius</i>              | Homeotherm  | 21.5              | 3.13              | $\text{mlO}_2 \text{ g}^{-1} \text{ h}^{-1}$ | 25.1 <sup>6</sup> | —             | McNab 1992               | 75  | 25.48    | 3.09      | NI        | NI    | -0.25        | 9.36       | NI                                    | NI         | NI         | NI             | 37.78    | NI       | 80.00     | 94.60     | 0.85              | 1.00          | No                      |
| <i>Rattus niobe</i>                        | Homeotherm  | 42.3              | 53.6              | $\text{mlO}_2 \text{ h}^{-1}$                | 26                | —             | Genoud 2014              | 62  | 27.56    | 56.18     | NI        | NI    | -4.56        | 181.97     | NI                                    | NI         | NI         | NI             | 39.97    | NI       | 84.90     | 89.00     | 0.76              | 0.98          | No                      |
| <i>Sorex coronatus</i>                     | Homeotherm  | 9.1               | 5.7               | $\text{mlO}_2 \text{ g}^{-1} \text{ h}^{-1}$ | 27.5              | —             | Sparti & Genoud 1989     | 33  | 22.61    | 5.94      | NI        | NI    | -0.24        | 11.37      | NI                                    | NI         | NI         | NI             | 47.56    | NI       | 95.20     | 97.20     | 0.97              | 0.81          | No                      |
| <i>Sorex minutus</i>                       | Homeotherm  | 3.3               | 8.6               | $\text{mlO}_2 \text{ g}^{-1} \text{ h}^{-1}$ | 27.5              | —             | Sparti & Genoud 1989     | 28  | 25.36    | 8.67      | NI        | NI    | -0.40        | 18.98      | NI                                    | NI         | NI         | NI             | 46.99    | NI       | 95.60     | 95.00     | 0.89              | 1.00          | No                      |
| <i>Talipeutes matatus</i>                  | Homeotherm  | 1160              | 0.181             | $\text{mlO}_2 \text{ g}^{-1} \text{ h}^{-1}$ | 28                | —             | McNab 1980b              | 66  | 29.57    | 0.19      | NI        | NI    | -0.04        | 1.24       | NI                                    | NI         | NI         | NI             | 33.94    | NI       | 76.80     | 95.30     | 0.85              | 1.00          | No                      |
| <i>Cercartetus lepidus</i>                 | Heterotherm | 12.6              | 1.49              | $\text{mlO}_2 \text{ g}^{-1} \text{ h}^{-1}$ | 28.8              | 5.3           | Geiser 1987              | 57  | 29.01    | 1.54      | 0.11      | 4.16  | -0.20        | 7.47       | 0.08                                  | 0.08       | 0.95       | 0.49           | 36.72    | 4.68     | 4.60      | 33.50     | 0.98              | 1.00          | Yes                     |
| <i>Cercartetus nanus</i>                   | Heterotherm | 36                | 0.66              | $\text{mlO}_2 \text{ g}^{-1} \text{ h}^{-1}$ | 28.7              | 4.8           | Song et al. 1997         | 171 | 26.15    | 0.64      | 0.06      | 2.86  | -0.14        | 4.29       | 0.05                                  | 0.05       | 0.46       | 0.27           | 30.55    | 3.26     | 8.10      | 27.10     | 0.95              | 0.85          | Yes                     |
| <i>Cynopteris brachyotis</i>               | Heterotherm | 37.4              | 1.27              | $\text{mlO}_2 \text{ g}^{-1} \text{ h}^{-1}$ | 29.7 <sup>6</sup> | —             | McNab 1989               | 51  | 29.08    | 1.25      | 0.74      | 25.23 | -0.21        | 7.18       | NI                                    | NI         | NI         | NI             | 34.38    | 28.76    | 44.80     | 94.30     | 0.76              | 0.92          | Yes                     |
| <i>Dasyuroides byrnei</i> <sup>1</sup>     | Heterotherm | 118.2             | 0.7               | $\text{mlO}_2 \text{ g}^{-1} \text{ h}^{-1}$ | 28.3 <sup>7</sup> | 15            | Geiser & Baudinette 1987 | 75  | 26.13    | 0.64      | 0.38      | 12.97 | -0.12        | 3.66       | 0.01                                  | 0.34       | 1.89       | 0.67           | 31.51    | 16.24    | 21.50     | 29.90     | 0.89              | 0.87          | Yes                     |
| <i>Eptesicus fuscus</i>                    | Heterotherm | 15                | 16.98             | $\text{mlO}_2 \text{ h}^{-1}$                | 26.7              | 0             | Willis et al. 2005       | 29  | 27.46    | 6.69      | 0.61      | NI    | -2.81        | 83.39      | NI                                    | NI         | NI         | NI             | 29.66    | NI       | 13.60     | 80.50     | 0.93              | 1.00          | Yes                     |
| <i>Lasiurus cinereus</i> <sup>2</sup>      | Heterotherm | 23.5 <sup>4</sup> | 9                 | $\text{mW g}^{-1}$                           | 30                | —             | Cryan & Wolf 2003        | 48  | 26.87    | 8.95      | 1.67      | 8.68  | -1.09        | 38.23      | NI                                    | NI         | NI         | NI             | 35.15    | 10.22    | 24.70     | 78.00     | 0.90              | 0.81          | Yes                     |
| <i>Lasiurus seminolus</i>                  | Heterotherm | 9.4 <sup>5</sup>  | 1.26 <sup>5</sup> | $\text{mlO}_2 \text{ g}^{-1} \text{ h}^{-1}$ | 32                | 5             | Genoud 1993              | 204 | 30.69    | 1.43      | 0.12      | 6.27  | -0.42        | 14.22      | 0.08                                  | 0.08       | 2.74       | 0.60           | 34.03    | 6.57     | 7.60      | 23.20     | 0.95              | 0.99          | Yes                     |
| <i>Macroglossus minimus</i>                | Heterotherm | 16.3              | 1.29              | $\text{mlO}_2 \text{ g}^{-1} \text{ h}^{-1}$ | 30.9              | 20.4          | Bartels et al. 1998      | 46  | 30.54    | 0.90      | 0.47      | 20.38 | -0.16        | 5.89       | 0.06                                  | 0.16       | 3.78       | 0.93           | 36.32    | 23.35    | 27.50     | 26.30     | 0.65              | 0.97          | Yes                     |
| <i>Macroglossus minimus</i> <sup>3</sup>   | Heterotherm | 16.4              | 0.88              | $\text{mlO}_2 \text{ g}^{-1} \text{ h}^{-1}$ | 31                | 21            | Bonaccorso & McNab 1997  | 47  | 30.05    | 1.23      | 0.78      | 18.79 | -0.22        | 7.75       | NI                                    | NI         | NI         | NI             | 35.78    | 22.39    | 30.50     | 79.50     | 0.91              | 1.00          | Yes                     |
| <i>Melonycteris melanops</i>               | Heterotherm | 53.3              | 0.81              | $\text{mlO}_2 \text{ g}^{-1} \text{ h}^{-1}$ | 28                | —             | Bonaccorso & McNab 1997  | 30  | 28.84    | 0.81      | 0.44      | 17.05 | -0.13        | 4.47       | NI                                    | NI         | NI         | NI             | 35.00    | 20.53    | 64.60     | 87.30     | 0.83              | 1.00          | Yes                     |
| <i>Natalus tumidirostris</i>               | Heterotherm | 5.4               | 1.54              | $\text{mlO}_2 \text{ g}^{-1} \text{ h}^{-1}$ | 28                | 20            | Genoud et al. 1990       | 30  | 27.22    | 1.46      | 0.82      | 19.00 | -0.58        | 17.07      | NI                                    | NI         | NI         | NI             | 29.54    | 20.42    | 58.70     | 76.70     | 0.83              | 1.00          | Yes                     |
| <i>Nyctophilus geoffroyi</i>               | Heterotherm | 8                 | 1.42              | $\text{mlO}_2 \text{ g}^{-1} \text{ h}^{-1}$ | 34                | —             | Hosken & Withers 1999    | 84  | 32.32    | 1.43      | 0.24      | 8.62  | -0.27        | 10.12      | 0.05                                  | 0.18       | 2.56       | 0.52           | 37.60    | 9.53     | 23.70     | 65.60     | 1.00              | 1.00          | Yes                     |
| <i>Peropteryx macrotis</i>                 | Heterotherm | 5.1               | 2.31              | $\text{mlO}_2 \text{ g}^{-1} \text{ h}^{-1}$ | 30.5              | 20            | Genoud et al. 1990       | 49  | 35.01    | 2.50      | 1.80      | 20.36 | -0.22        | 10.14      | 0.02                                  | 1.35       | 6.20       | 0.90           | 46.99    | 28.70    | 22.30     | 60.40     | 0.71              | 0.66          | Yes                     |
| <i>Pipistrellus pipistrellus</i>           | Heterotherm | 4.9               | 7.6               | $\text{mlO}_2 \text{ h}^{-1}$                | 33.2              | 0             | Genoud & Christe 2011    | 95  | 32.79    | 7.62      | 0.54      | 2.22  | -3.01        | 106.17     | 0.08                                  | 0.46       | 7.20       | 0.80           | 35.32    | 2.40     | 6.40      | 19.60     | 1.00              | 1.00          | Yes                     |
| <i>Planigale gilesi</i>                    | Heterotherm | 8.3               | 1.43              | $\text{mlO}_2 \text{ g}^{-1} \text{ h}^{-1}$ | 28.5 <sup>8</sup> | 14            | Geiser & Baudinette 1988 | 62  | 27.76    | 1.53      | 0.30      | 13.41 | -0.37        | 11.65      | 0.07                                  | 0.13       | 5.19       | 0.55           | 31.93    | 14.22    | 19.90     | 34.40     | 0.89              | 1.00          | Yes                     |
| <i>Setifer setosus</i>                     | Heterotherm | 530               | 0.231             | $\text{mlO}_2 \text{ g}^{-1} \text{ h}^{-1}$ | 28                | —             | McNab 1980b              | 56  | 29.37    | 0.23      | 0.14      | NI    | -0.03        | 1.18       | 0.01                                  | 0.14       | NI         | 0.88           | 36.20    | NI       | 34.70     | 56.60     | 0.77              | 0.95          | Yes                     |
| <i>Sminthopsis macroura</i>                | Heterotherm | 24.8              | 0.89              | $\text{mlO}_2 \text{ g}^{-1} \text{ h}^{-1}$ | 31.3              | 14            | Song et al. 1995         | 155 | 30.80    | 0.84      | 0.18      | 16.39 | -0.19        | 6.63       | 0.09                                  | 0.05       | 3.27       | 0.77           | 35.24    | 17.36    | 16.50     | 30.60     | 0.97              | 1.00          | Yes                     |
| <i>Steatomys pratensis</i>                 | Heterotherm | 27.5              | 1.315             | $\text{mlO}_2 \text{ g}^{-1} \text{ h}^{-1}$ | 28                | 20            | Ellison 1995             | 39  | 26.73    | 1.24      | 0.26      | 16.38 | -0.18        | 6.02       | 0.07                                  | 0.13       | 3.18       | 0.42           | 33.88    | 17.85    | 21.60     | 45.40     | 0.77              | 1.00          | Yes                     |
| <i>Syconycteris australis</i>              | Heterotherm | 17.8              | 1.44              | $\text{mlO}_2 \text{ g}^{-1} \text{ h}^{-1}$ | 29.5              | 18            | Geiser et al. 1996       | 91  | 32.13    | 1.27      | 0.49      | 15.11 | -0.14        | 5.78       | 0.05                                  | 0.24       | 2.61       | 0.90           | 41.31    | 18.62    | 21.60     | 28.60     | 0.88              | 0.95          | Yes                     |
| <i>Syconycteris australis</i> <sup>1</sup> | Heterotherm | 18                | 1.38              | $\text{mlO}_2 \text{ g}^{-1} \text{ h}^{-1}$ | 30.2              | 18            | Coburn & Geiser 1998     | 93  | 27.53    | 1.49      | 0.61      | 16.37 | -0.17        | 6.00       | 0.07                                  | 0.23       | 3.33       | 0.86           | 36.22    | 20.07    | 32.00     | 43.10     | 0.85              | 0.97          | Yes                     |
| <i>Zoedys pichi</i>                        | Heterotherm | 1740              | 0.226             | $\text{mlO}_2 \text{ g}^{-1} \text{ h}^{-1}$ | 28                | —             | McNab 1980b              | 57  | 31.82    | 0.23      | 0.15      | 22.49 | -0.02        | 0.94       | 0.02                                  | 0.11       | 0.65       | 0.82           | 42.25    | 29.47    | 29.30     | 71.70     | 0.70              | 0.75          | Yes                     |

Subset of published data considered: <sup>1</sup>=summer group; <sup>2</sup>=males; <sup>3</sup>=lowland population.

$m$ =average body mass; Autor's  $M_{TNZ}$ =author's estimation of metabolic rate within  $TNZ$ ;  $M$  units=units for metabolic rate; Authors'  $T_{lc}$  and  $T_t$ =author's estimation of lower critical temperature and threshold ambient temperature for torpor, respectively. When  $m$ ,  $M_{TNZ}$  or  $T_{lc}$  were not explicitly provided, they were: <sup>4</sup>=back-calculated from  $M_{TNZ}$  in % of expected from body mass; <sup>5</sup>=calculated as a weighted average of two seasonal groups; <sup>6</sup>=extracted from a graph; <sup>7</sup>=calculated as the intercept of the euthermic line and  $M_{TNZ}$  given by the authors; <sup>8</sup>=obtained as the mean of a given range;  $N$ =number of digitized data points (sample size); Model parameters are defined in text. NI=Parameter considered as not identifiable.
